# Supplementary material for: Autologous tolerogenic dendritic cells for rheumatoid and inflammatory arthritis
Source: PubMed Central journal article supplement (PMC5264217; doi:10.1136/annrheumdis-2015-208456), 2016-04-26
Supplement: annrheumdis-2015-208456supp2.pdf [file annrheumdis-2015-208456supp2.pdf]

## Supplementary Figures:

### Supplementary Figure S1. Knee Assessment Questionnaire

Thank you for taking the time to fill in this questionnaire.

Please answer the questions below by circling the number where you feel your knee symptoms are today:

- 0 no symptoms
- 1 slight symptoms
- 2 mild symptoms
- 3 moderate symptoms
- 4 severe symptoms
- 5 worst imaginable symptoms

1. Where is your knee pain today?

0 1 2 3 4 5

2. Where is your knee swelling today?

0 1 2 3 4 5

3. Where is your knee stiffness today?

0 1 2 3 4 5

4. Do you think that you are having a 'flare' in your knee today?

0 1 2 3 4 5

Finally, do you think that your knee has deteriorated overall since the baseline visit, before the treatment was given? Please answer yes or no!

Thank you

Supplementary Figure S2. Physician VAS for knee activity

Please place a vertical mark through the line where 0 = no disease activity and 10= worst possible disease activity for swelling, temperature, range of movement, erythema and overall disease activity:

1. Swelling

0 \_\_\_\_\_ 10

2. Temperature

0 \_\_\_\_\_ 10

3. Range of Movement

0 \_\_\_\_\_ 10

4. Erythema

0 \_\_\_\_\_ 10

5. Overall disease activity

0 \_\_\_\_\_ 10

Supplementary Figure S3. Participant Acceptability Questionnaire

Please circle the number that you feel applies best to the statements below:

1= totally disagree

2= partially disagree

3 = neither agree nor disagree

4 = partially agree

5= totally agree

1. Taking part in the study was convenient

1                    2                    3                    4                    5

2. The overall study was acceptable

1                    2                    3                    4                    5

3. I would take part in the study again

1                    2                    3                    4                    5

4. I found the knee joint aspiration acceptable

1                    2                    3                    4                    5

5. I found leukapheresis acceptable

1                    2                    3                    4                    5

6. I found the knee ultrasound scan acceptable

1                    2                    3                    4                    5

7. I found the arthroscopy (camera examination of the knee joint) acceptable

1                    2                    3                    4                    5

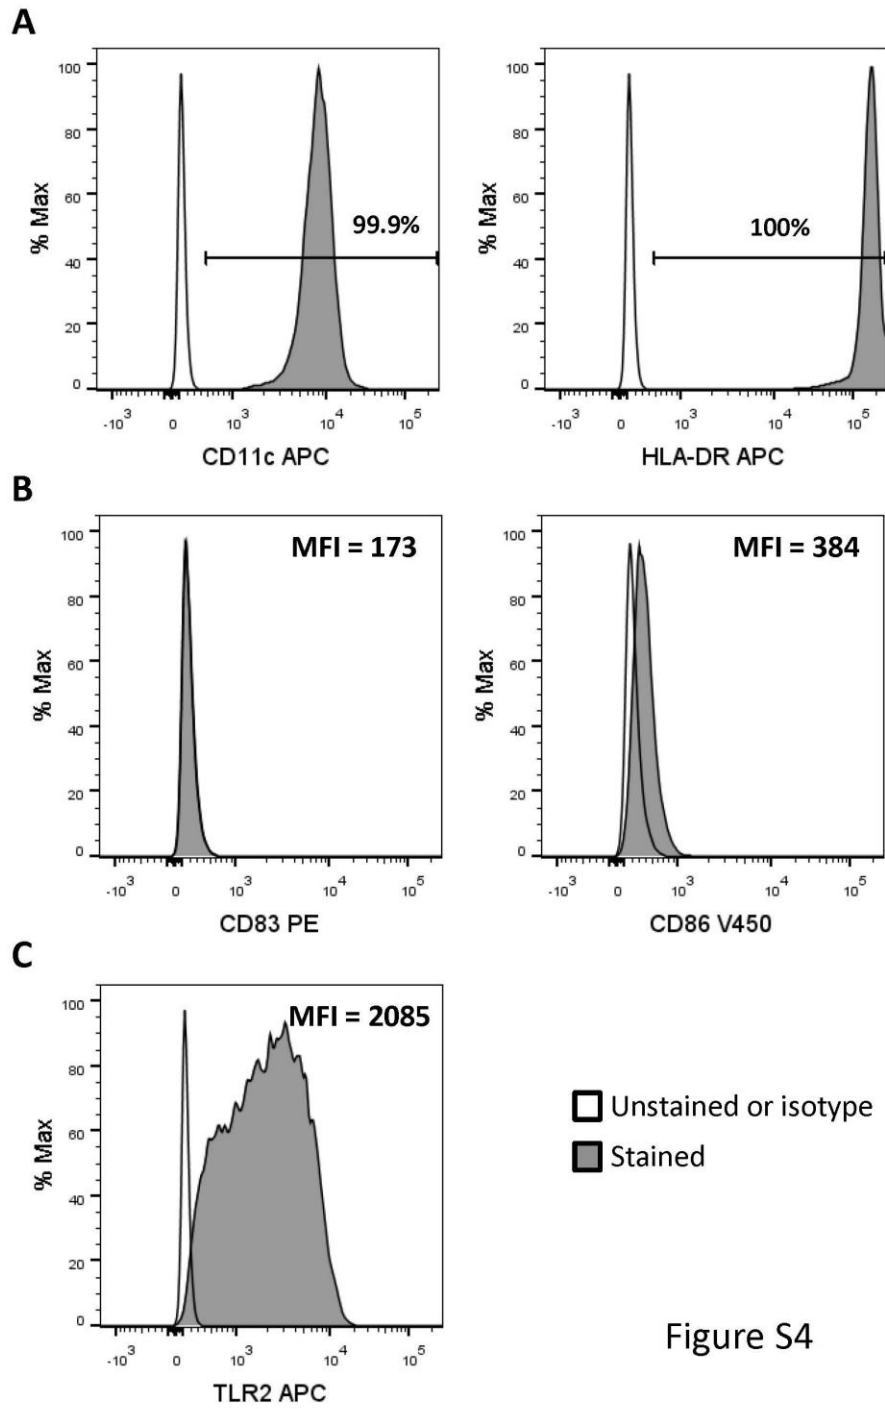

Figure S4

Figure 5

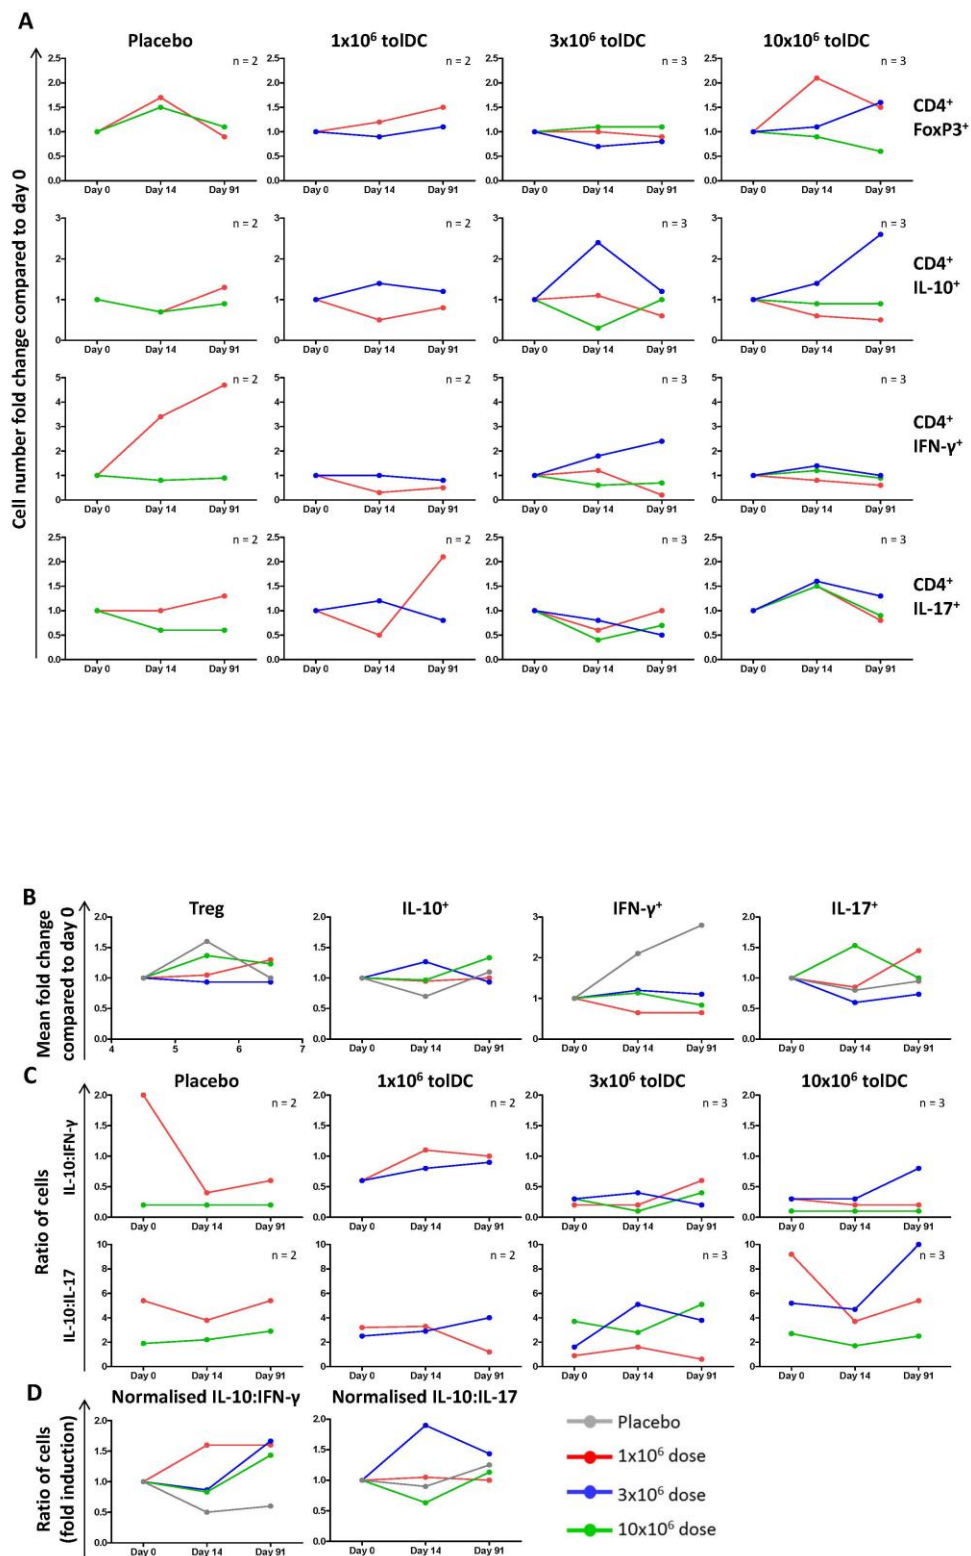

Figure S6

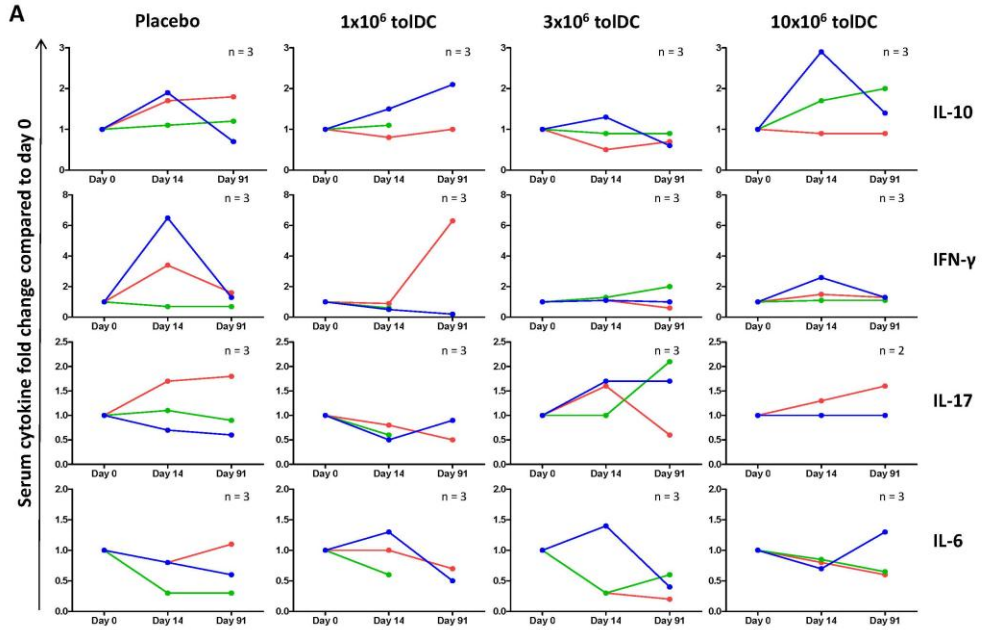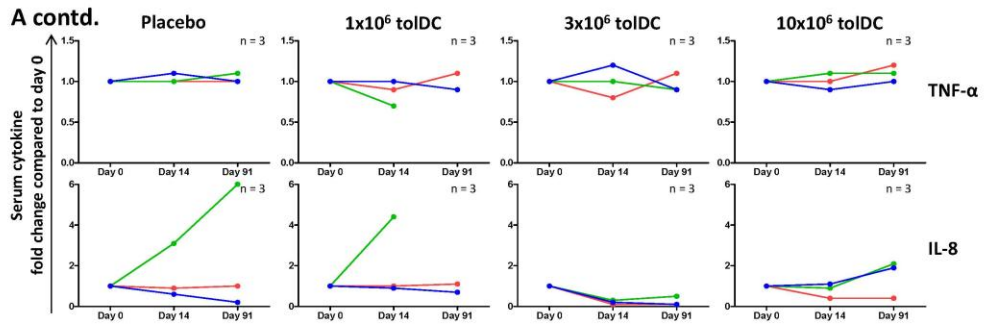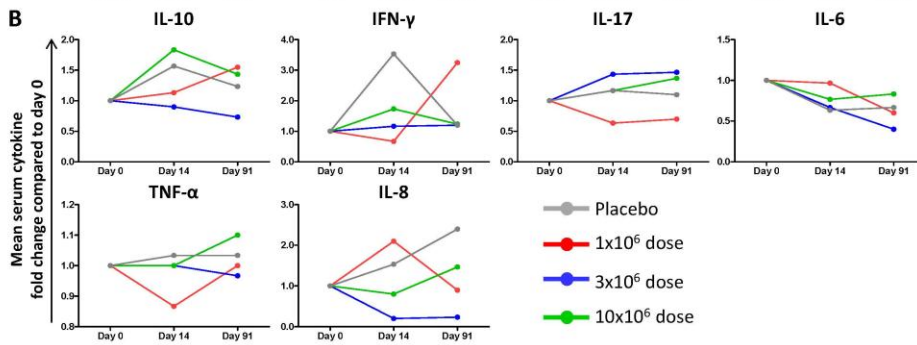

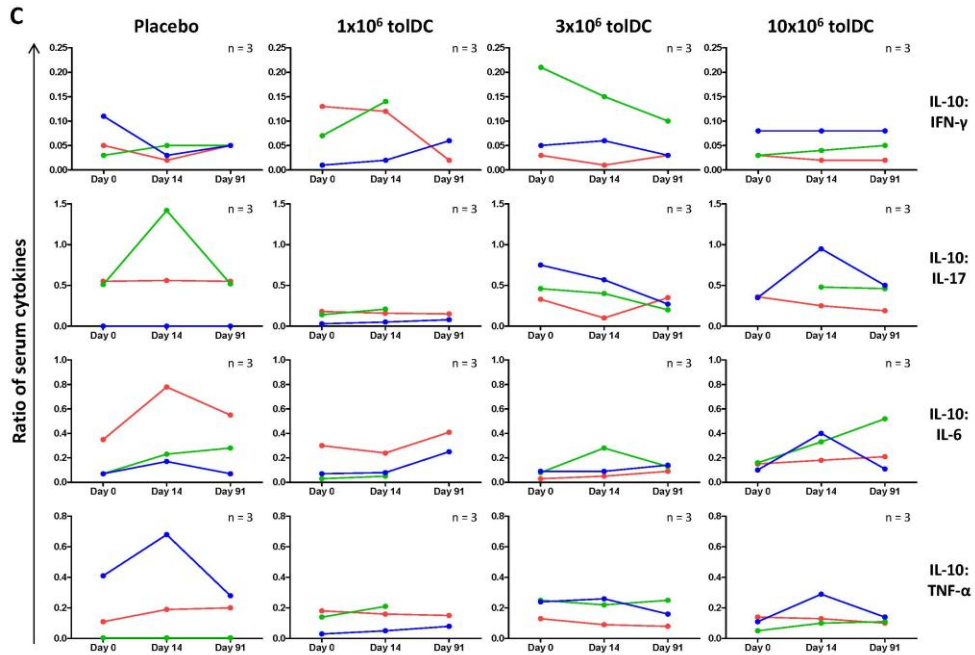

**C contd.**

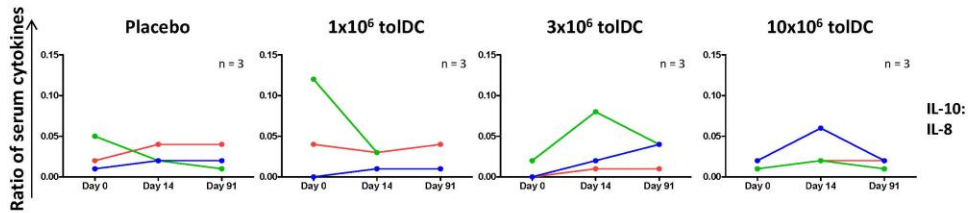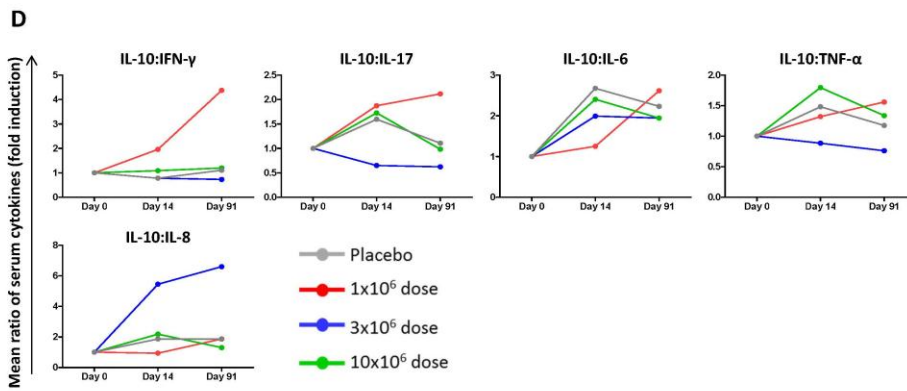

Supplementary Table S1. AuToDeCRA exclusion criteria

Serious or unstable co-morbidity

History of malignancy (except treated basal cell carcinoma of skin)

Known active infection at screening or at baseline (except fungal nail infection)

Infection requiring hospitalization or IV antibiotics within 6 weeks of baseline

Immunization with a live vaccine within 6 weeks of baseline

History of recurrent or chronic infection

History of and/or positive testing for the mandatory markers of hepatitis B or C, syphilis, HIV, CMV or HTLV-1/2 infections (requirements for GMP)

Standard haematological and biochemical exclusions

Pregnancy, planned pregnancy and breast feeding
